# Supplementary material for: First Identification and Phylogenetic Analysis of Porcine Circovirus Type 4 in Fur Animals in Hebei, China
Source: MDPI journal article supplement (doi:10.3390/ani12233325), 2022-11-28
Supplement: s1 [file s1]

**Table S1.** 137 clinical samples of fur animals collected from 110 fur animal farms in Hebei Province, China.

| Number | Farm | Coordinate                       |                       | Organ  | Collected date | Detecting results |      |      |
|--------|------|----------------------------------|-----------------------|--------|----------------|-------------------|------|------|
|        |      | (East longitude, north latitude) | Species of fur animal |        |                | PCV4              | PCV3 | PCV2 |
| 1      | 1    | 119.251,39.814                   | Raccoon dog           | Spleen | 2015.3.2       | -                 | -    | -    |
| 2      | 2    | 119.315,39.833                   | Raccoon dog           | Spleen | 2015.3.23      | -                 | -    | +    |
| 3      | 3    | 119.019,39.775                   | Raccoon dog           | Lung   | 2015.3.27      | -                 | -    | -    |
| 4      | 4    | 119.420,40.22                    | Raccoon dog           | Spleen | 2015.10.1      | +                 | -    | +    |
| 5      | 5    | 119.092,40.162                   | Raccoon dog           | Spleen | 2015.10.2      | -                 | -    | +    |
| 6      | 6    | 118.863,39.479                   | Raccoon dog           | Lung   | 2015.10.31     | -                 | -    | -    |
| 7      | 7    | 118.789,39.463                   | Mink                  | Serum  | 2015.11.1      | -                 | -    | +    |
| 8      | 8    | 119.314,39.833                   | Raccoon dog           | Spleen | 2015.4.28      | -                 | -    | -    |
| 9      | 9    | 119.207,39.816                   | Raccoon dog           | Lung   | 2015.6.24      | -                 | +    | +    |
| 10     | 10   | 119.177,39.815                   | Fox                   | Spleen | 2015.6.27      | -                 | +    | -    |
| 11     | 11   | 119.013,39.705                   | Raccoon dog           | Serum  | 2015.7.13      | +                 | +    | +    |
| 12     | 12   | 119.210,40.229                   | Mink                  | Serum  | 2015.7.13      | -                 | -    | +    |
| 13     | 13   | 119.127,40.145                   | Raccoon dog           | Lung   | 2015.7.16      | -                 | -    | -    |
| 14     | 14   | 119.255,39.459                   | Fox                   | Liver  | 2015.7.28      | -                 | -    | +    |
| 15     | 15   | 119.222,39.425                   | Raccoon dog           | Liver  | 2015.7.29      | +                 | +    | +    |
| 16     | 16   |                                  | Raccoon dog           | Spleen | 2015.7.14      | -                 | -    | -    |
| 17     | 16   | 119.950,40.252                   | Raccoon dog           | Spleen | 2017.9.25      | -                 | -    | +    |
| 18     | 16   |                                  | Raccoon dog           | Spleen | 2019.7.14      | -                 | -    | -    |
| 19     | 17   | 119.064,40.226                   | Raccoon dog           | Serum  | 2015.8.15      | -                 | -    | +    |
| 20     | 18   | 119.0180,40.162                  | Raccoon dog           | Serum  | 2015.8.16      | -                 | +    | -    |
| 21     | 19   | 119.222,39.425                   | Raccoon dog           | Spleen | 2015.8.5       | -                 | -    | -    |
| 22     | 20   | 119.264,39.829                   | Mink                  | Spleen | 2015.8.5       | +                 | -    | +    |

|    |    |                |             |                 |            |   |   |   |
|----|----|----------------|-------------|-----------------|------------|---|---|---|
| 23 | 21 | 119.299,39.857 | Raccoon dog | Lung            | 2015.9.2   | - | - | + |
| 24 | 22 | 119.209,39.78  | Raccoon dog | Lung            | 2015.9.22  | - | - | - |
| 25 | 23 | 119.314,39.833 | Raccoon dog | Brain           | 2017.5.15  | - | - | - |
| 26 | 24 | 119.069,39.744 | Raccoon dog | Lung            | 2017.6.27  | - | - | + |
| 27 | 25 | 118.934,40.116 | Raccoon dog | Small intestine | 2017.6.29  | - | + | + |
| 28 | 26 | 118.901,40.021 | Raccoon dog | Small intestine | 2017.1.13  | - | - | + |
| 29 | 27 | 119.050,39.746 | Raccoon dog | Lung            | 2017.10.23 | - | - | + |
| 30 | 27 |                | Raccoon dog | Lung            | 2019.7.31  | - | - | - |
| 31 | 28 | 118.934,40.116 | Raccoon dog | Spleen          | 2017.2.19  | - | - | + |
| 32 | 29 | 118.974,40.205 | Raccoon dog | Lung            | 2017.2.26  | - | + | + |
| 33 | 29 |                | Raccoon dog | Lung            | 2019.2.26  | - | + | + |
| 34 | 30 | 119.073,39.705 | Mink        | Serum           | 2017.2.9   | + | + | + |
| 35 | 31 | 119.103,39.689 | Raccoon dog | Lung            | 2017.6.22  | - | - | + |
| 36 | 32 | 118.844,39.465 | Raccoon dog | Brain           | 2017.6.27  | - | - | + |
| 37 | 33 | 118.836,39.401 | Fox         | Lung            | 2017.7.19  | - | + | + |
| 38 | 34 | 119.131,39.659 | Raccoon dog | Liver           | 2018.12.23 | - | + | - |
| 39 | 35 | 119.193,39.660 | Raccoon dog | Lung            | 2018.6.15  | - | - | + |
| 40 | 36 | 119.203,39.640 | Raccoon dog | Lung            | 2018.6.22  | + | + | - |
| 41 | 37 | 119.220,39.636 | Raccoon dog | Lymph node      | 2018.6.24  | - | - | - |
| 42 | 38 |                | Fox         | Spleen          | 2018.6.25  | - | - | - |
| 43 | 38 | 119.223,39.585 | Raccoon dog | Spleen          | 2018.6.25  | - | - | - |
| 44 | 38 |                | Raccoon dog | Spleen          | 2018.6.25  | + | + | + |
| 45 | 39 | 119.245,39.604 | Fox         | Lung            | 2018.6.26  | + | + | + |
| 46 | 40 | 119.250,39.726 | Raccoon dog | Spleen          | 2018.6.29  | - | + | - |
| 47 | 41 | 119.220,39.763 | Raccoon dog | Lung            | 2018.6.29  | - | + | - |
| 48 | 42 | 119.196,39.771 | Raccoon dog | Lung            | 2018.7.11  | - | + | + |
| 49 | 43 | 119.179,39.789 | Raccoon dog | Lymph node      | 2018.7.16  | - | - | - |

|    |    |                |             |            |            |   |   |   |
|----|----|----------------|-------------|------------|------------|---|---|---|
| 50 | 44 | 119.224,39.830 | Raccoon dog | Lung       | 2018.7.17  | - | + | + |
| 51 | 45 | 119.295,39.858 | Raccoon dog | Lung       | 2018.7.25  | - | + | - |
| 52 | 46 | 119.315,39.832 | Raccoon dog | Lung       | 2018.7.27  | - | - | + |
| 53 | 47 | 119.250,39.726 | Raccoon dog | Lymph node | 2018.7.9   | + | + | - |
| 54 | 48 | 118.844,39.465 | Raccoon dog | Lung       | 2018.8.19  | - | + | - |
| 55 | 49 | 119.315,39.832 | Raccoon dog | Lung       | 2018.8.31  | + | - | - |
| 56 | 50 | 119.363,39.863 | Raccoon dog | Lung       | 2018.9.2   | - | + | - |
| 57 | 51 | 119.294,39.92  | Raccoon dog | Lung       | 2019.3.19  | - | + | - |
| 58 | 52 | 119.444,39.887 | Raccoon dog | Serum      | 2019.3.19  | + | + | - |
| 59 | 52 |                | Raccoon dog | Serum      | 2019.3.19  | + | + | - |
| 60 | 53 | 119.250,39.726 | Raccoon dog | Lung       | 2019.7.10  | - | - | + |
| 61 | 54 | 119.374,39.877 | Raccoon dog | Lymph node | 2019.1.16  | - | - | - |
| 62 | 55 | 119.442,39.887 | Raccoon dog | Lung       | 2019.10.11 | - | - | + |
| 63 | 56 | 119.386,39.981 | Raccoon dog | Spleen     | 2019.10.2  | - | - | + |
| 64 | 57 | 119.476,39.989 | Raccoon dog | Lung       | 2019.10.31 | - | - | - |
| 65 | 58 | 119.374,39.877 | Raccoon dog | Spleen     | 2019.10.4  | - | - | + |
| 66 | 59 | 119.423,39.976 | Raccoon dog | Lung       | 2019.10.9  | - | - | + |
| 67 | 60 | 119.220,39.763 | Raccoon dog | Lymph node | 2019.5.27  | - | - | - |
| 68 | 61 | 119.301,40.124 | Raccoon dog | Spleen     | 2019.6.12  | - | - | - |
| 69 | 62 | 119.295,40.11  | Raccoon dog | Spleen     | 2019.6.12  | - | + | + |
| 70 | 63 | 119.231,40.104 | Raccoon dog | Lung       | 2019.6.22  | - | - | - |
| 71 | 64 | 119.220,40.07  | Raccoon dog | Lung       | 2019.6.24  | - | - | - |
| 72 | 65 | 119.248,40.120 | Fox         | Spleen     | 2019.6.3   | - | - | - |
| 73 | 66 | 119.295,40.11  | Raccoon dog | Lung       | 2019.6.7   | - | - | - |
| 74 | 67 | 119.179,39.789 | Raccoon dog | Spleen     | 2019.7.1   | - | - | - |
| 75 | 68 | 119.374,39.877 | Raccoon dog | Serum      | 2019.7.15  | - | - | - |
| 76 | 69 | 119.295,40.11  | Raccoon dog | Lymph node | 2019.7.20  | - | - | - |

|     |    |                |             |            |           |   |   |   |
|-----|----|----------------|-------------|------------|-----------|---|---|---|
| 77  | 69 |                | Raccoon dog | Spleen     | 2019.7.20 | - | - | - |
| 78  | 70 | 119.206,40.107 | Raccoon dog | Spleen     | 2019.7.20 | - | + | - |
| 79  | 71 | 119.442,39.887 | Raccoon dog | Spleen     | 2019.7.4  | - | - | + |
| 80  | 72 | 119.157,40.073 | Raccoon dog | Kidney     | 2019.8.24 | - | - | - |
| 81  | 73 | 119.121,40.284 | Raccoon dog | Lung       | 2019.8.25 | - | - | - |
| 82  | 74 | 119.097,40.316 | Raccoon dog | Lung       | 2019.8.7  | + | - | - |
| 83  | 75 | 119.135,40.335 | Raccoon dog | Spleen     | 2019.8.8  | - | + | - |
| 84  | 76 | 119.220,39.763 | Raccoon dog | Lung       | 2019.9.03 | - | + | - |
| 85  | 77 | 119.120,40.359 | Raccoon dog | Spleen     | 2019.9.17 | - | - | + |
| 86  | 78 | 119.105,40.364 | Fox         | Lung       | 2019.9.2  | - | - | + |
| 87  | 79 | 119.096,40.472 | Raccoon dog | Lymph node | 2019.9.30 | - | - | + |
| 88  | 80 | 119.281,40.146 | Raccoon dog | Serum      | 2019.9.12 | - | - | + |
| 89  | 80 |                | Raccoon dog | Serum      | 2019.9.12 | - | - | + |
| 90  | 81 | 119.248,40.120 | Raccoon dog | Spleen     | 2020.9.29 | - | + | - |
| 91  | 81 |                | Raccoon dog | Spleen     | 2020.9.29 | - | + | - |
| 92  | 82 |                | Raccoon dog | Lung       | 2019.5.23 | - | - | - |
| 93  | 82 |                | Raccoon dog | Kidney     | 2019.5.23 | - | - | - |
| 94  | 82 |                | Raccoon dog | Lung       | 2019.6.3  | - | + | + |
| 95  | 82 |                | Raccoon dog | Spleen     | 2019.6.13 | - | - | - |
| 96  | 82 | 119.248,40.109 | Raccoon dog | Spleen     | 2019.6.18 | + | - | - |
| 97  | 82 |                | Raccoon dog | Spleen     | 2019.4.3  | + | - | - |
| 98  | 82 |                | Raccoon dog | Spleen     | 2019.4.5  | - | - | + |
| 99  | 82 |                | Raccoon dog | Liver      | 2019.4.16 | - | - | - |
| 100 | 82 |                | Raccoon dog | Kidney     | 2019.4.18 | - | - | - |
| 101 | 82 |                | Raccoon dog | Lung       | 2019.4.18 | - | - | - |
| 102 | 83 | 119.053,40.323 | Mink        | Liver      | 2017.9.13 | + | - | - |
| 103 | 83 | 119.067,40.341 | Raccoon dog | Spleen     | 2017.9.13 | + | - | + |

|     |     |                |             |        |            |   |   |   |
|-----|-----|----------------|-------------|--------|------------|---|---|---|
| 104 | 84  | 119.067,40.341 | Raccoon dog | Kidney | 2017.11.11 | + | - | - |
| 105 | 85  | 119.173,40.121 | Raccoon dog | Lung   | 2017.10.27 | - | + | - |
| 106 | 86  | 119.126,40.273 | Mink        | Spleen | 2017.8.21  | - | - | - |
| 107 | 87  | 119.147,40.508 | Mink        | Spleen | 2017.6.23  | - | - | - |
| 108 | 88  |                | Mink        | Lung   | 2017.12.9  | - | + | + |
| 109 | 88  | 119.177,40.116 | Mink        | Kidney | 2017.12.9  | + | - | - |
| 110 | 88  |                | Mink        | Kidney | 2017.12.9  | + | - | + |
| 111 | 88  |                | Mink        | Kidney | 2017.12.9  | + | + | + |
| 112 | 89  | 119.295,40.11  | Raccoon dog | Lung   | 2017.10.14 | + | - | + |
| 113 | 90  | 119.121,40.284 | Fox         | Kidney | 2017.10.2  | + | - | - |
| 114 | 91  | 119.126,40.273 | Raccoon dog | Lung   | 2017.10.27 | + | - | - |
| 115 | 92  | 119.181,40.515 | Raccoon dog | Spleen | 2016.6.29  | + | - | - |
| 116 | 93  | 119.203,40.498 | Raccoon dog | Kidney | 2017.7.1   | + | + | - |
| 117 | 94  | 119.270,40.575 | Fox         | Brain  | 2017.11.17 | - | - | - |
| 118 | 94  |                | Fox         | Lung   | 2017.11.17 | - | - | + |
| 119 | 95  | 119.720,40.217 | Fox         | Serum  | 2017.10.1  | - | - | - |
| 120 | 96  | 119.586,40.244 | Raccoon dog | Spleen | 2018.1.17  | - | - | - |
| 121 | 97  | 119.468,40.361 | Fox         | Liver  | 2017.11.17 | - | - | - |
| 122 | 97  |                | Fox         | Liver  | 2017.11.17 | - | - | - |
| 123 | 98  | 119.468,40.361 | Raccoon dog | Spleen | 2017.7.12  | - | - | + |
| 124 | 99  | 118.850,40.547 | Fox         | Spleen | 2017.8.21  | - | - | + |
| 125 | 100 | 119.126,40.273 | Raccoon dog | Spleen | 2017.6.27  | - | - | - |
| 126 | 101 | 118.757,40.177 | Fox         | Liver  | 2017.11.11 | - | - | - |
| 127 | 102 | 119.222,39.830 | Raccoon dog | Liver  | 2017.9.26  | - | + | - |
| 128 | 103 |                | Mink        | Lung   | 2017.12.16 | - | - | - |
| 129 | 103 | 118.700,40.123 | Mink        | Lung   | 2017.12.16 | + | + | + |
| 130 | 103 |                | Fox         | Lung   | 2017.12.16 | + | - | - |

|     |     |                |             |                 |            |   |   |   |
|-----|-----|----------------|-------------|-----------------|------------|---|---|---|
| 131 | 104 | 118.922,40.219 | Raccoon dog | Lung            | 2018.1.1   | + | - | + |
| 132 | 105 | 119.152,39.627 | Raccoon dog | Lung            | 2018.1.23  | + | - | - |
| 133 | 106 | 118.978,39.785 | Raccoon dog | Spleen          | 2017.6.28  | - | - | - |
| 134 | 107 | 118.880,39.801 | Raccoon dog | Small intestine | 2017.9.1   | + | + | - |
| 135 | 108 | 118.798,39.824 | Raccoon dog | Lung            | 2018.1.9   | - | - | + |
| 136 | 109 | 118.939,39.955 | Raccoon dog | Small intestine | 2017.11.11 | - | - | - |
| 137 | 110 | 118.996,39.587 | Raccoon dog | Spleen          | 2017.7.5   | + | + | + |

---

**Table S2.** Information of 86 representative isolates studied in this research.

| Strain         | Accession no. | Genotype | Strain                | Accession no. | Genotype          |
|----------------|---------------|----------|-----------------------|---------------|-------------------|
| PCV1           | AY193712.1    | PCV1     | CN/NM1/2017           | MT882410.1    | PCV4              |
| BJ-1           | FJ475129.1    | PCV1     | JSYZ1901-2            | MT769268.1    | PCV4              |
| Hun            | KJ408799.1    | PCV1     | HNU-AHG1-2019         | NC055580.1    | PCV4              |
| LV34           | MN508363.1    | PCV1     | E115                  | MT882344.1    | PCV4              |
| XFD-Beijing    | KC447455.1    | PCV1     | Henan-LY1-2019        | MT015686.1    | PCV4              |
| HLJ1502        | KY940535.1    | PCV2     | HNU-AHG1-2019         | MK986820.1    | PCV4              |
| France         | AF055394.1    | PCV2     | KU-02010              | MW712668.1    | PCV4              |
| SD6            | DQ218421.1    | PCV2     | JXSC-2021             | MW988109.1    | PCV4              |
| DK1980PMWSfree | EU148503.1    | PCV2     | JXWY-2021             | MW988108.1    | PCV4              |
| TJ             | AY181946.1    | PCV2     | Hebei-AP1-2019        | MW084633.1    | PCV4              |
| BJ0901b        | GU001710.1    | PCV2     | HN-ZK-201707          | MW600960.1    | PCV4              |
| GX0601         | EF524532.1    | PCV2     | HN-XX-201601          | MW600959.1    | PCV4              |
| Rac-hb1        | MH373555.1    | PCV2     | HN-ZMD-201212         | MW600958.1    | PCV4              |
| Rac-hb2        | MH373556.1    | PCV2     | HN-ZK-201601          | MW600957.1    | PCV4              |
| Rac-hb3        | MH373557.1    | PCV2     | HN-ZK-201512          | MW600956.1    | PCV4              |
| Rac-hb4        | MH373558.1    | PCV2     | HN-ZZ-201603          | MW600955.1    | PCV4              |
| Rac-hb5        | MH373559.1    | PCV2     | KF-02-2019            | MT193105.1    | PCV4              |
| Rac-hb6        | MH373560.1    | PCV2     | KF-01-2019            | MT193106.1    | PCV4              |
| FoxHB1         | MH373552.1    | PCV2     | HN-LY-202005          | MW538943.1    | PCV4              |
| FoxHB2         | MH373553.1    | PCV2     | HN-LY-202006          | MW600947.1    | PCV4              |
| FoxHB3         | MH373554.1    | PCV2     | HN-LY-202007          | MW600948.1    | PCV4              |
| Pig-hb1        | MK305871.1    | PCV2     | HN-SMX-202011         | MW600949.1    | PCV4              |
| Pig-hb2        | MK305872.1    | PCV2     | HN-XX-201811          | MW600950.1    | PCV4              |
| Pig-hb3        | MK305873.1    | PCV2     | HN-KF-201812          | MW600951.1    | PCV4              |
| Pig-hb4        | MK305874.1    | PCV2     | HN-HB-201704          | MW600952.1    | PCV4              |
| China/GD2016   | KY418606.1    | PCV3     | HN-XX-201212          | MW600953.1    | PCV4              |
| NWHEB21        | MG564174.1    | PCV3     | HN-LY-201702          | MW600954.1    | PCV4              |
| GDBL1          | MF405272.1    | PCV3     | NG13                  | GQ404856.1    | circular virus    |
| Jiangxi-3      | MF589106.1    | PCV3     | Canine circovirus 214 | JQ821392.1    | Canine circovirus |

|                   |            |      |                                       |            |                           |
|-------------------|------------|------|---------------------------------------|------------|---------------------------|
| CN FJ-1           | KY753912.1 | PCV3 | Canine<br>circovirus C85              | MK944080.1 | Canine<br>circovirus      |
| CHN/GD2016        | KY421347.1 | PCV3 | Mulard duck<br>circovirus<br>DuCV     | AY228555.1 | Mulard duck<br>circovirus |
| Guangdong-HY<br>1 | MF589102.1 | PCV3 | Duck<br>circovirus-FJZZ<br>302        | GQ423747.1 | Duck<br>circovirus        |
| MO2015            | KX778720.1 | PCV3 | Fox<br>circovirus-5559<br>0           | KP941114.1 | Fox<br>circovirus         |
| Henan-13          | KY075988.1 | PCV3 | Fox<br>circovirus-VS71<br>00003       | KP260926.1 | Fox<br>circovirus         |
| KU-1608           | KY996344.1 | PCV3 | Zebra finch<br>circovirus 32469       | KU641384.1 | Zebra finch<br>circovirus |
| GX2020/FCG49      | MT311854.1 | PCV4 | Finch circovirus                      | DQ845075.1 | Finch<br>circovirus       |
| GX2020/GL69       | MT311853.1 | PCV4 | Goose<br>circovirus<br>TW9-2001       | AF536939.1 | Goose<br>circovirus       |
| GX2020/NN88       | MT311852.1 | PCV4 | Goose<br>circovirus-JX1               | GU320569.1 | Goose<br>circovirus       |
| PCV4-LY2017       | MW759029.1 | PCV4 | Canary<br>circovirus                  | AJ301633.1 | Canary<br>circovirus      |
| PCV4-HB2017       | MW759028.1 | PCV4 | Mink circovirus<br>SD16               | MG001455.1 | Mink<br>circovirus        |
| PCV4-YY2019       | MW759027.1 | PCV4 | Mink circovirus<br>MiCV-DL13          | NC023885.1 | Mink<br>circovirus        |
| PCV4-LY2020       | MW759026.1 | PCV4 | Bat associated<br>circovirus 1<br>XOR | NC038385.1 | Bat<br>circovirus         |
| FJ-PCV4           | MT721742.1 | PCV4 | Bat<br>circovirus-Daqui<br>ng3        | KX756994.1 | Bat<br>circovirus         |

---
